# Supplementary material for: A lactate-dependent shift of glycolysis mediates synaptic and cognitive processes in male mice
Source: PubMed Central journal article supplement — Nat Commun. 2024 Aug 9;15:6842. doi: 10.1038/s41467-024-51008-2 (PMC11316019; doi:10.1038/s41467-024-51008-2), 2024-08-09
Supplement: 41467_2024_51008_MOESM1_ESM.pdf [file 41467_2024_51008_MOESM1_ESM.pdf]

## SUPPLEMENTARY INFORMATION

### **A lactate-dependent shift of glycolysis mediates synaptic and cognitive processes in male mice**

Ignacio Fernández-Moncada<sup>1\*</sup>, Gianluca Lavanco<sup>1,2,16,17</sup>, Unai B. Fundazuri<sup>1,17</sup>, Nasrin Bollmohr<sup>1,17</sup>, Sarah Mountadem<sup>1,17</sup>, Tommaso Dalla Tor<sup>1,2,17</sup>, Pauline Hachaguer<sup>1</sup>, Francisca Julio-Kalajzic<sup>1</sup>, Doriane Gisquet<sup>1</sup>, Roman Serrat<sup>1,3</sup>, Luigi Bellocchio<sup>1</sup>, Astrid Cannich<sup>1</sup>, Bérénice Fortunato-Marsol<sup>1</sup>, Yusuke Nasu<sup>4,5</sup>, Robert E. Campbell<sup>4,6</sup>, Filippo Drago<sup>2</sup>, Carla Cannizzaro<sup>7</sup>, Guillaume Ferreira<sup>3</sup>, Anne-Karine Bouzier-Sore<sup>8</sup>, Luc Pellerin<sup>9</sup>, Juan P. Bolaños<sup>10,11,12</sup>, Gilles Bonvento<sup>13</sup>, L. Felipe Barros<sup>14,15</sup>, Stephane H. R. Oliet<sup>1</sup>, Aude Panatier<sup>1,18</sup>, Giovanni Marsicano<sup>1,18,\*</sup>

<sup>1</sup>Univ. Bordeaux, INSERM, Neurocentre Magendie, U1215, F-33000 Bordeaux, France.

<sup>2</sup>Department of Biomedical and Biotechnological Sciences, Section of Pharmacology, University of Catania, Catania 95124, Italy.

<sup>3</sup>University of Bordeaux, INRAE, Bordeaux INP, NutriNeuro, UMR 1286, Bordeaux, France.

<sup>4</sup>Department of Chemistry, School of Science, The University of Tokyo, Bunkyo-ku, Tokyo 113-0033, Japan.

<sup>5</sup>PRESTO, Japan Science and Technology Agency, Chiyoda-ku, Tokyo 102-0075, Japan.

<sup>6</sup>Université Laval, CERVO Brain Research Center and Department of Biochemistry, Microbiology, and Bioinformatics, Québec, Québec, Canada.

<sup>7</sup>Department of Biomedicine, Neuroscience and Advanced Diagnostics, University of Palermo, Italy.

<sup>8</sup>Université de Bordeaux, CNRS, Centre de Résonance Magnétique des Systèmes Biologiques, UMR 5536, F-33000 Bordeaux, France.

<sup>9</sup>Université de Poitiers et CHU de Poitiers, INSERM, IRMETIST, U1313, Poitiers, France.

<sup>10</sup>Institute of Functional Biology and Genomics (IBFG), Universidad de Salamanca, CSIC, Salamanca, Spain.

<sup>11</sup>Institute of Biomedical Research of Salamanca (IBSAL), Hospital Universitario de Salamanca, Salamanca, Spain.

<sup>12</sup>Centro de Investigación Biomédica en Red de Fragilidad y Envejecimiento Saludable (CIBERFES), Madrid, Spain.

<sup>13</sup>Université Paris-Saclay, CEA, CNRS, MIRCen, Laboratoire des Maladies Neurodegeneratives, Fontenay-aux-Roses, France.

<sup>14</sup>Centro de Estudios Científicos, Valdivia, Chile.

<sup>15</sup>Universidad San Sebastián, Facultad de Medicina y Ciencia, Valdivia, Chile.

<sup>16</sup>Current address: Department of Health Promotion, Mother and Child Care, Internal Medicine and Medical Specialties, "G. D'Alessandro", University of Palermo. Palermo 90127, Italy.

<sup>17</sup>These authors contributed equally.

<sup>18</sup>These authors jointly supervised this work.

\*Correspondence:

[giovanni.marsicano@inserm.fr](mailto:giovanni.marsicano@inserm.fr) (G.M.)

[ignacio.fernandez-moncada@inserm.fr](mailto:ignacio.fernandez-moncada@inserm.fr) (I.F-M.)

### **Inventory of Supporting Information**

**Supplementary Fig. 1** – Differential effect of cannabinoids on astrocyte lactate level.

**Supplementary Fig. 2** – The basal lactate level and accumulation upon mitochondria inhibition is not altered by CB1 receptor subcellular localization.

**Supplementary Fig. 3** – Activation of astroglial CB1 receptors increases lactate production.

**Supplementary Fig. 4** – The PKC signaling controls the CB1 receptor-mediated intracellular lactate increase.

**Supplementary Fig. 5** – The mitochondrial localization of CB1 receptors is not necessary for physiological novel object exploration.

**Supplementary Fig. 6** – Inhibition of the phosphorylated pathway impairs long-term NOR memory in WT mice and in lactate-treated GFAP-CB1-KO mice.

**Supplementary Fig. 7** – Activation of HCA1R promotes a biased glucose metabolism.

**Supplementary Fig. 8** – Lactate requires the phosphorylated pathway to potentiate NMDAR function.

**Supplementary Fig. 9** – Lactate rescues the THC-mediated impairment in novel object exploration via HCAR1 signaling and L-serine production.

**Supplementary Fig. 10** – A lactate-dependent shift of glycolysis mediates synaptic and cognitive processes.

**Supplementary Table 1** – Details of the double-viral rescue approach to study mtCB1 receptor involvement in NOR performance

**Supplementary Table 2** – Statistics details of Main Figures.

**Supplementary Table 3** – Statistics details of Supplementary Figures.

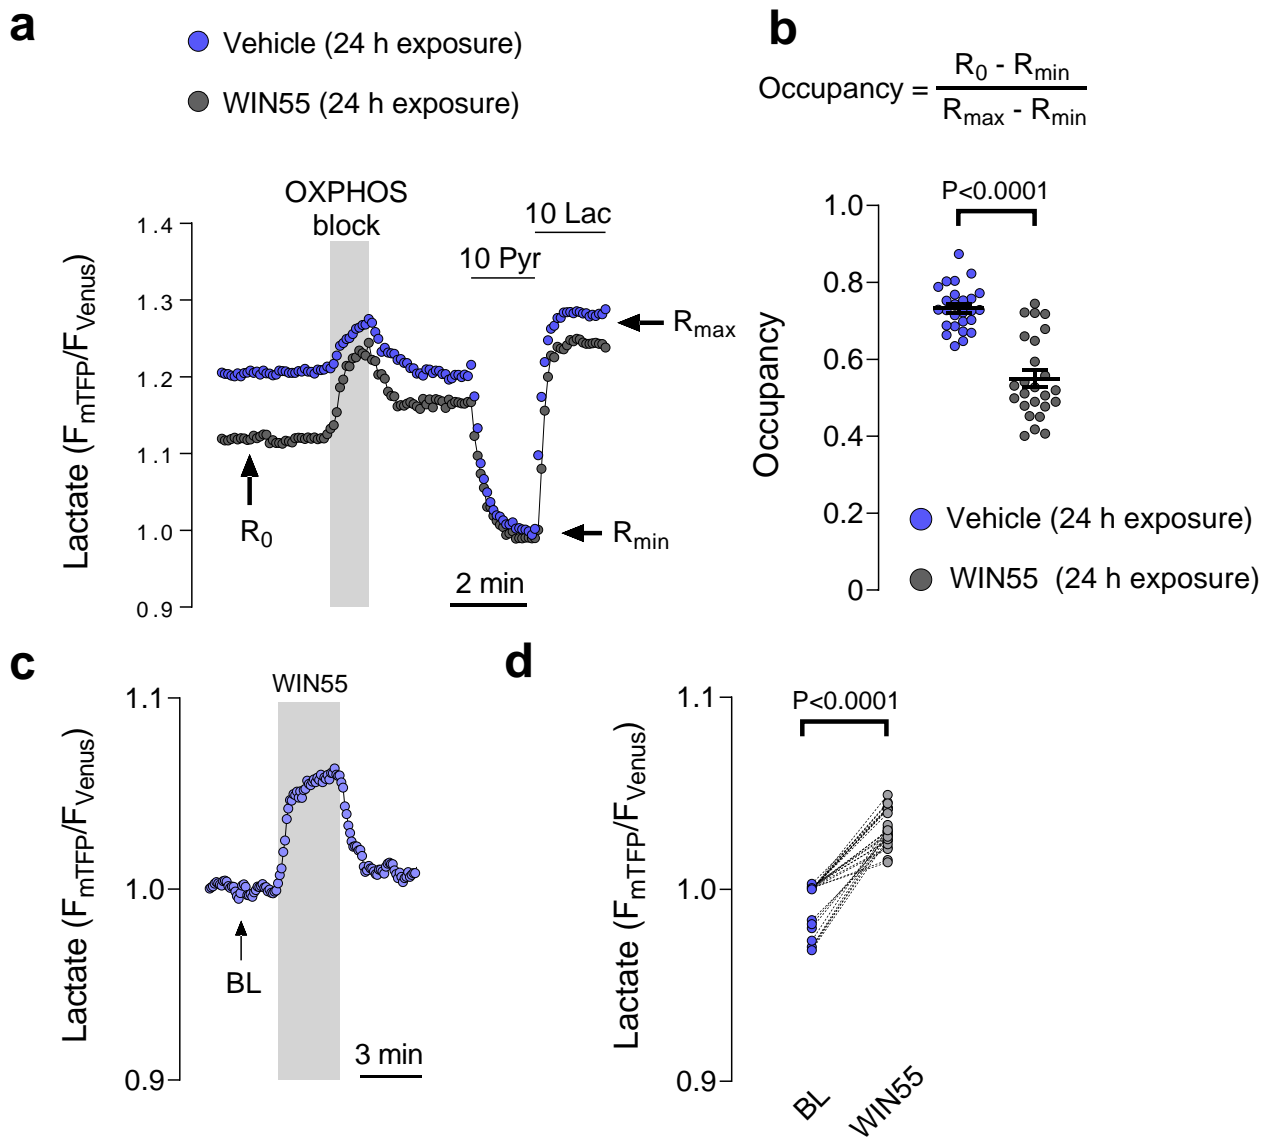

**Supplementary Figure 1 – Differential effect of cannabinoids on astrocyte lactate level. a,** Intracellular lactate imaging in astrocytes previously incubated with WIN55 (2  $\mu$ M) or vehicle (DMSO) for 24 hours. After treatment, and to determine the basal lactate level (occupancy), cells were imaged and exposed sequentially to an OXPPOS blocker (5 mM sodium azide), pyruvate (10 mM) and lactate (10 mM).  $R_0$ , basal ratio.  $R_{\min}$ , minimum ratio.  $R_{\max}$ , maximum ratio. Data was normalized to  $R_{\min}$  to emphasize the difference in  $R_0$ . **b,** Basal lactate level (occupancy) after 24 hours treatment with WIN55 (2  $\mu$ M) or vehicle (DMSO). Data was computed as occupancy =  $(R_0 - R_{\min}) / (R_{\max} - R_{\min})$ , using  $R_0$ ,  $R_{\min}$  and  $R_{\max}$  from experiments similar to panel A. Vehicle, n=3, 26 cells. WIN55, n=3, 25 cells. **c,** Intracellular lactate imaging in astrocytes acutely exposed to WIN55 (2  $\mu$ M). BL = baseline. **d,** Summary of intracellular lactate level at baseline (BL) and after 3 min exposure to WIN55 (2  $\mu$ M), in experiments similar to Supplementary Fig. 1C, n=3, 26 cells. Data correspond to representative cells (**a,c**). Circles in scatter and before-after plots correspond to single cells (**b,d**). Statistical analysis was performed using a two-tailed unpaired t-test (**b**) and two-tailed paired t-test (**d**). See Supplementary Table 3 for more details. Source data are provided as a Source Data file.

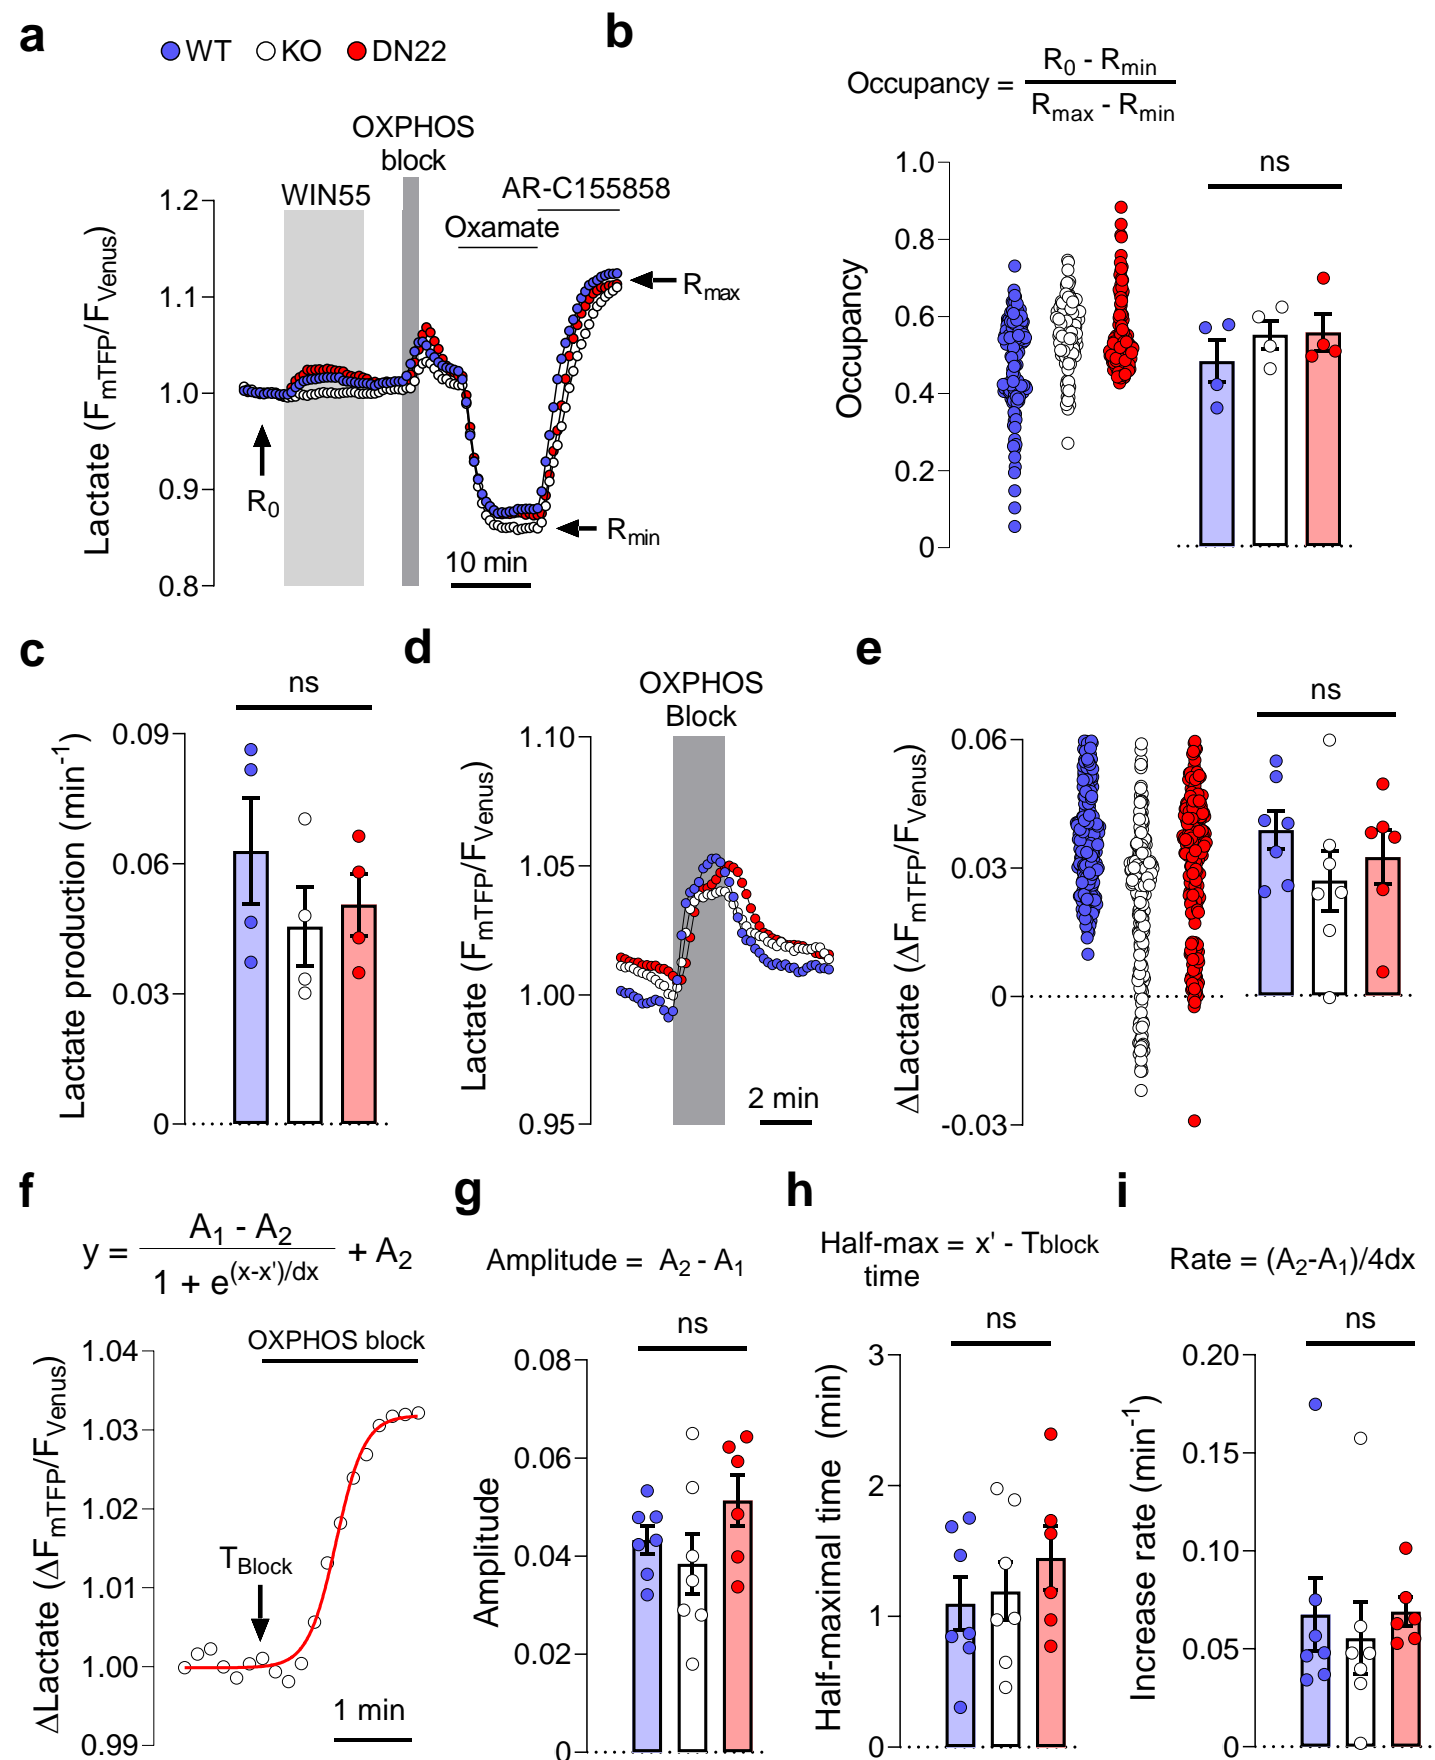

**Supplementary Figure 2 – The basal lactate level and accumulation upon mitochondria inhibition is not altered by CB1 receptor subcellular localization.** **a**, Intracellular lactate imaging in astrocytes. To determine the basal lactate level (occupancy), cells exposed sequentially to WIN55 (1  $\mu$ M), OXPPOS block (5 mM azide), Oxamate (6 mM) and AR-C155858 (1  $\mu$ M).  $R_0$ , basal ratio.  $R_{min}$ , minimum ratio.  $R_{max}$ , maximum ratio. Average of 4 independent experiments. Cells: WT=158, KO=145, DN22=154. **b**, Basal lactate level (occupancy) in CB1-WT, CB1-KO and DN22-CB1-KI astrocytes. Data was computed as occupancy =  $(R_0 - R_{min}) / (R_{max} - R_{min})$ , using  $R_0$ ,  $R_{min}$  and  $R_{max}$  obtained from experiments similar to panel A. N = 4, cells analyzed: CB1-WT=158, CB1-KO=145, DN22-CB1-KI =154. **c**, Basal lactate production rates in WT, KO and DN22 astrocytes. N=4 **d**, Intracellular lactate accumulation induced by OXPPOS block (5 mM sodium azide). Average of several cells in a representative experiment (CB1-WT=32, CB1-KO=48, DN22-CB1-KI =36 cells). **e**, Summary of intracellular lactate levels after 2 min of OXPPOS block (5 mM sodium azide), in experiments similar to those shown in panel C. CB1-WT: n=7, 247 cells. CB1-KO: n=7, 227 cells. DN22-CB1-KI: n=6, 205 cells. **f**, Representative non-linear fitting of a sigmoidal model (Boltzmann equation, on top) to the lactate increase induced by OXPPOS blocking. The fitted parameters  $A_1$ ,  $A_2$ ,  $x'$  and  $dx$  were used to compute the amplitude, half-maximal time and increase rate presented in panel G-I.  $T_{block}$ , time of exposure to OXPPOS blocker sodium azide. **g**, Amplitude of lactate changes induced by OXPPOS block obtained from a non-linear fitting data. CB1-WT: n=7; CB1-KO: n=7; DN22-CB1-KI: n=6. **h**, Half-maximal time of lactate changes induced by OXPPOS block obtained from a non-linear fitting data. CB1-WT: n=7; CB1-KO: n=7; DN22-CB1-KI: n=6. **i**, Half-maximal time of lactate changes induced by OXPPOS block obtained from a non-linear fitting data. CB1-WT: n=7; CB1-KO: n=7; DN22-CB1-KI: n=6. Data corresponds to the experiments average and represented as mean $\pm$ SEM (**a,d**). Circles in scatter plots correspond to single cells (**b,e**). Bars correspond to experiments average (mean $\pm$ SEM) and circles represent individual experiment average (**b,c,e,g,h,i**). Statistical analysis was performed using Kruskal-Wallis test followed by Dunn's multiple comparison test (**b**), One-way ANOVA followed by Tukey's multiple comparison test (**c,e,g,h,i**). See Supplementary Table 3 for more details. Source data are provided as a Source Data file.

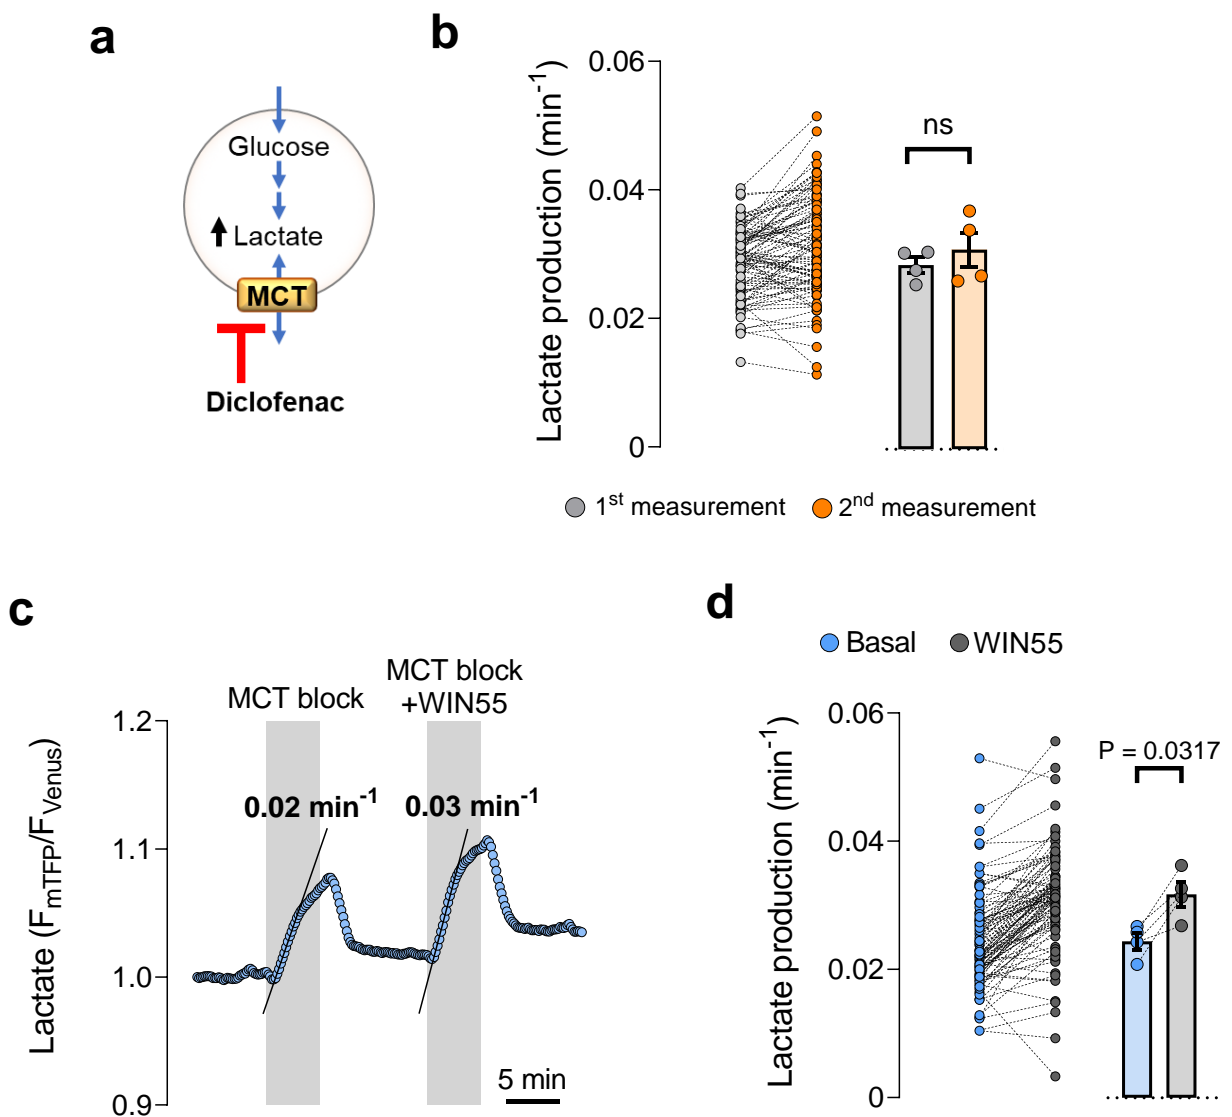

### Supplementary Figure 3 – Activation of astroglial CB1 receptors increases lactate production.

**a**, Transport stop protocol for measurement of lactate production. Diclofenac is a broad inhibitor of monocarboxylate transporter (MCT) activity. The blockade of MCT causes an intracellular lactate accumulation that is proportional to its rate of production. **b**, Summary of two sequential measurements of basal lactate production with diclofenac. N=4, 95 cells analyzed. **c**, Measurement of lactate production before and during exposure to WIN55 (1  $\mu\text{M}$ ). The production rate is indicated with a solid line above the corresponding lactate accumulation. **d**, Summary of the lactate production rates before (pale blue circles) and during exposure to WIN55 (grey circles), computed from experiments similar to panel E. N=4, 102 cells. Data corresponds to representative cell I. Circles in before – after plots correspond to single cells (**b,d**). Bars correspond to experiments average (mean $\pm$ SEM) and circles represent individual experiment average (**b,d**). Statistical analysis was performed using a paired two-tailed paired t-test (**b,d**). See Supplementary Table 3 for more details. Source data are provided as a Source Data file.

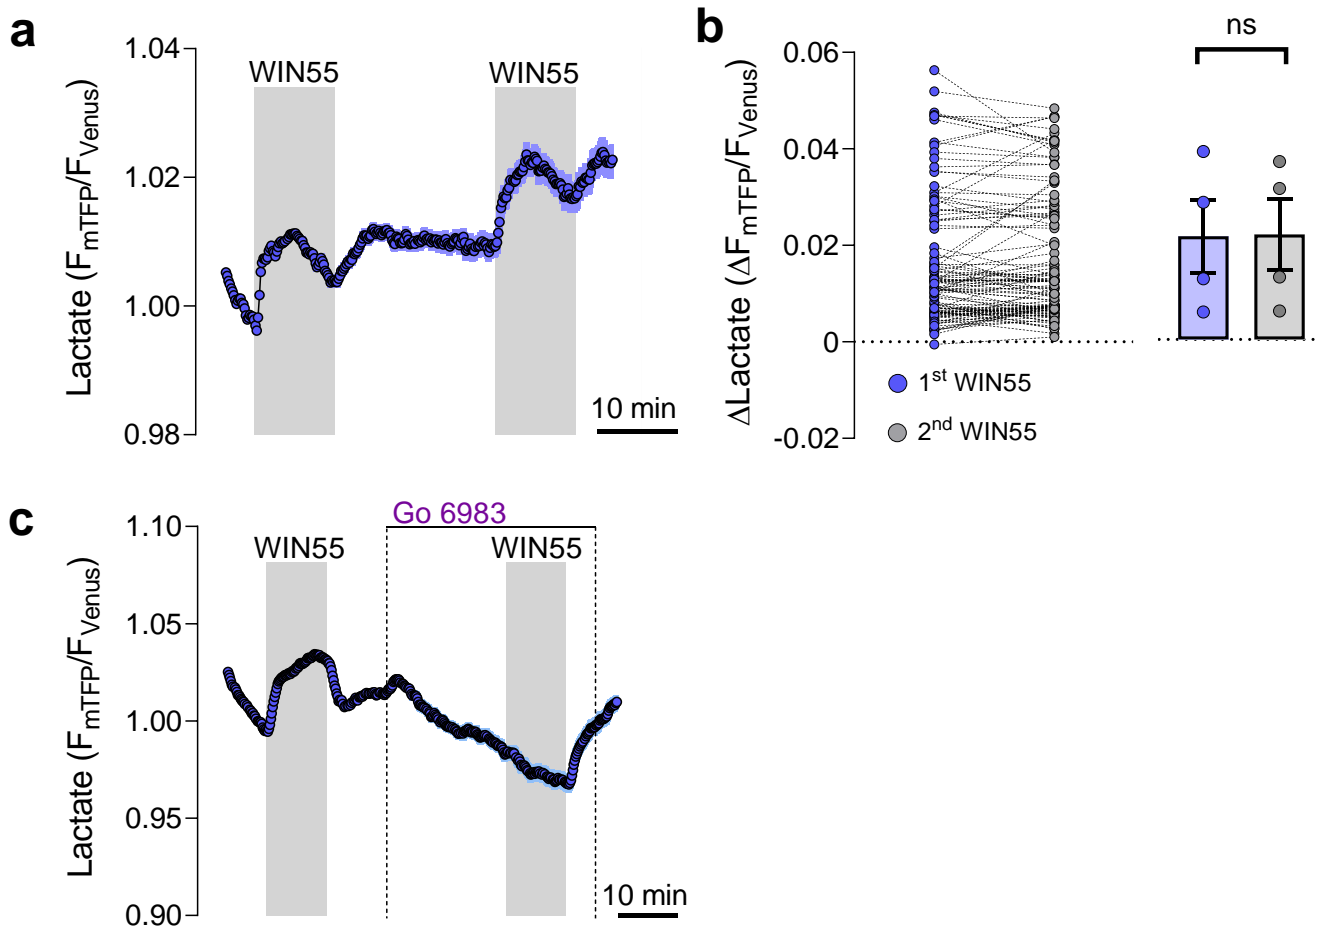

**Supplementary Figure 4 – The PKC signaling controls the CB1 receptor-mediated intracellular lactate increase.** **a**, Intracellular lactate measurement during exposure two sequential exposure to WIN55 (1  $\mu$ M). N=1, 42 cells. **b**, Quantification of lactate change induced by the first (blue) and second (grey) WIN55 exposure. N=4, 114 cells analyzed. **c**, Intracellular lactate measurement during the sequential exposure to WIN55 (1  $\mu$ M), Go 6983 (5  $\mu$ M) and WIN55 + Go 6983. N=1, 40 cells. Data corresponds to the average of a single experiment (**a,d**). Circles in before – after plots correspond to single cells (**b**). Bars correspond to experiments average (mean $\pm$ SEM) and circles represent individual experiment average (**b**). Statistical analysis was performed using a paired two-tailed paired t-test (**b**). See Supplementary Table 3 for more details. Source data are provided as a Source Data file.

**a**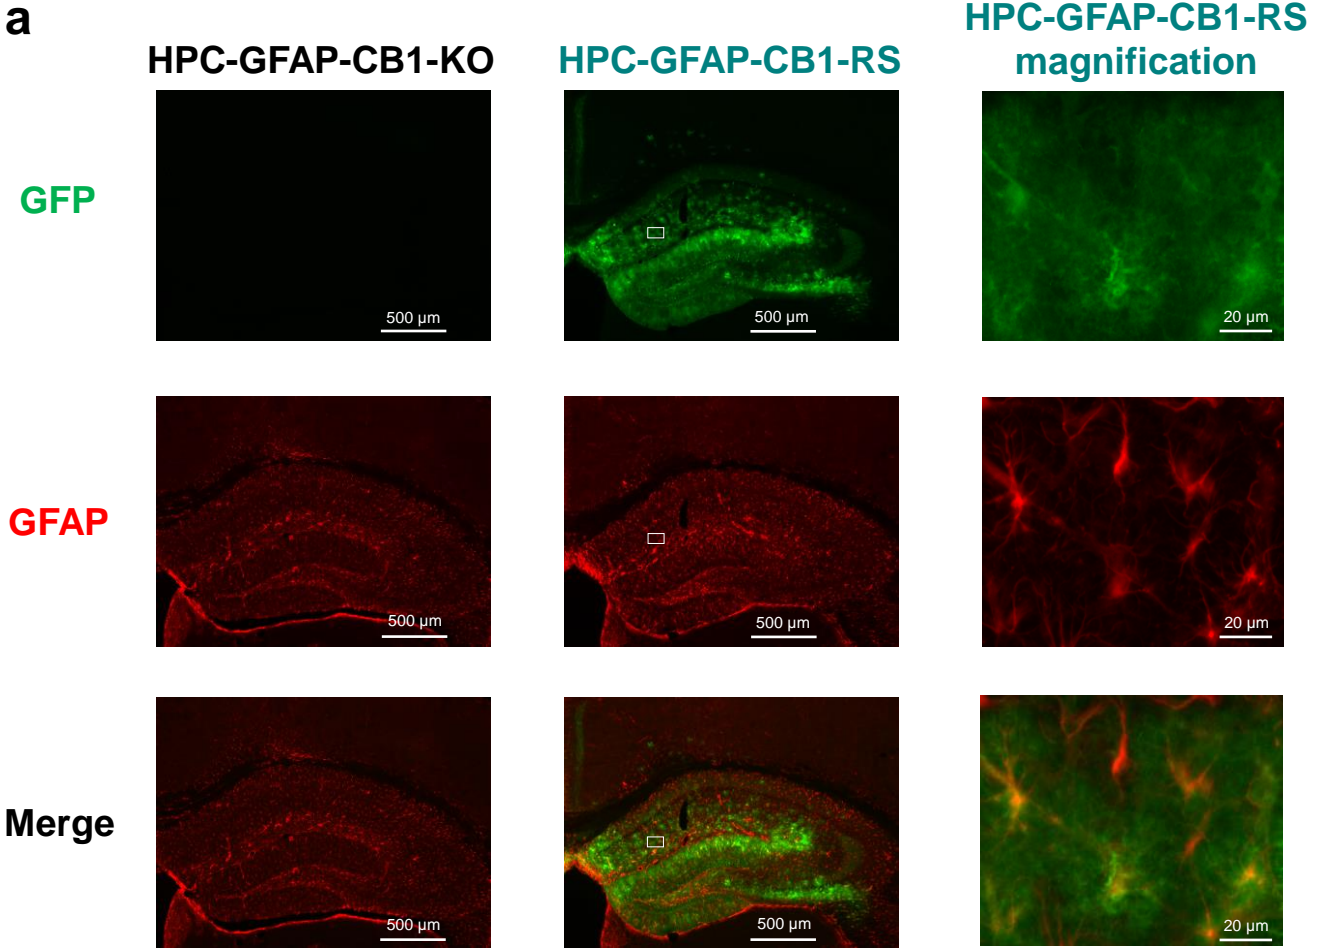**b**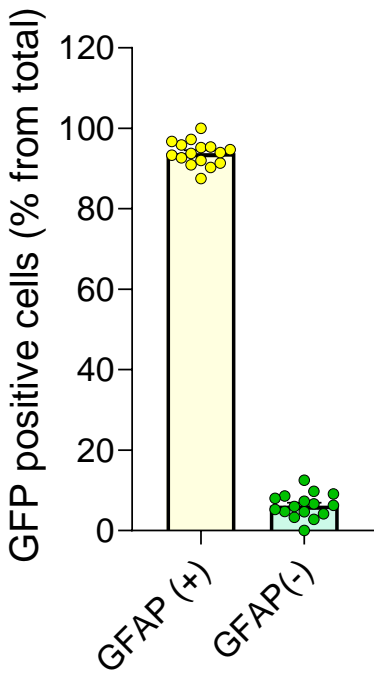**c**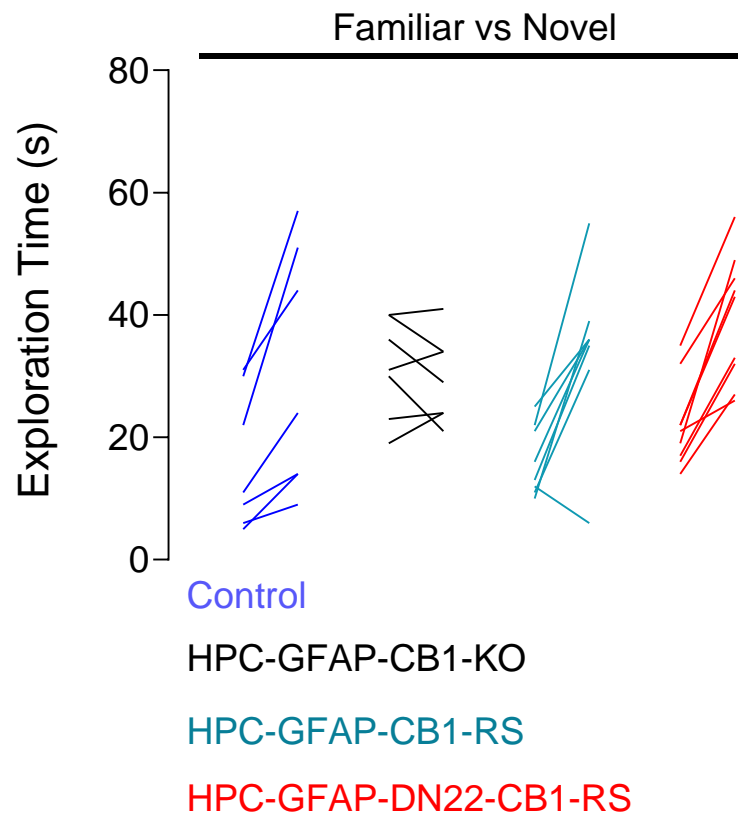



**Supplementary Figure 5 – The mitochondrial localization of CB1 receptors is not necessary for physiological novel object exploration.** **a**, Histological analysis of the expression of CB1-GFP and the astrocyte marker GFAP, in hippocampus sections obtained from HPC-GFAP-CB1-KO and HPC-GFAP-CB1-WT-RS. The white boxes inside the HPC-GFAP-CB1-WT-RS images correspond to the magnification site shown in the third column of images. **b**, Quantification of GFP-positive cells in the CA1 region of the hippocampus of HPC-GFAP-CB1-WT-RS mice. N = 4 mice, 30 – 91 cells analyzed in 4 sections per mice. **c**, Exploration times of familiar versus novel objects in the NOR task, from Control (blue lines), HPC-GFAP-CB1-KO (black lines), HPC-GFAP-CB1-WT-RS (teal lines) and HPC-GFAP- DN22-CB1-RS (red lines) animals, n = 7-9 mice per condition. A single line corresponds to an individual animal. See Supplementary Table 3 for more details. Source data are provided as a Source Data file.

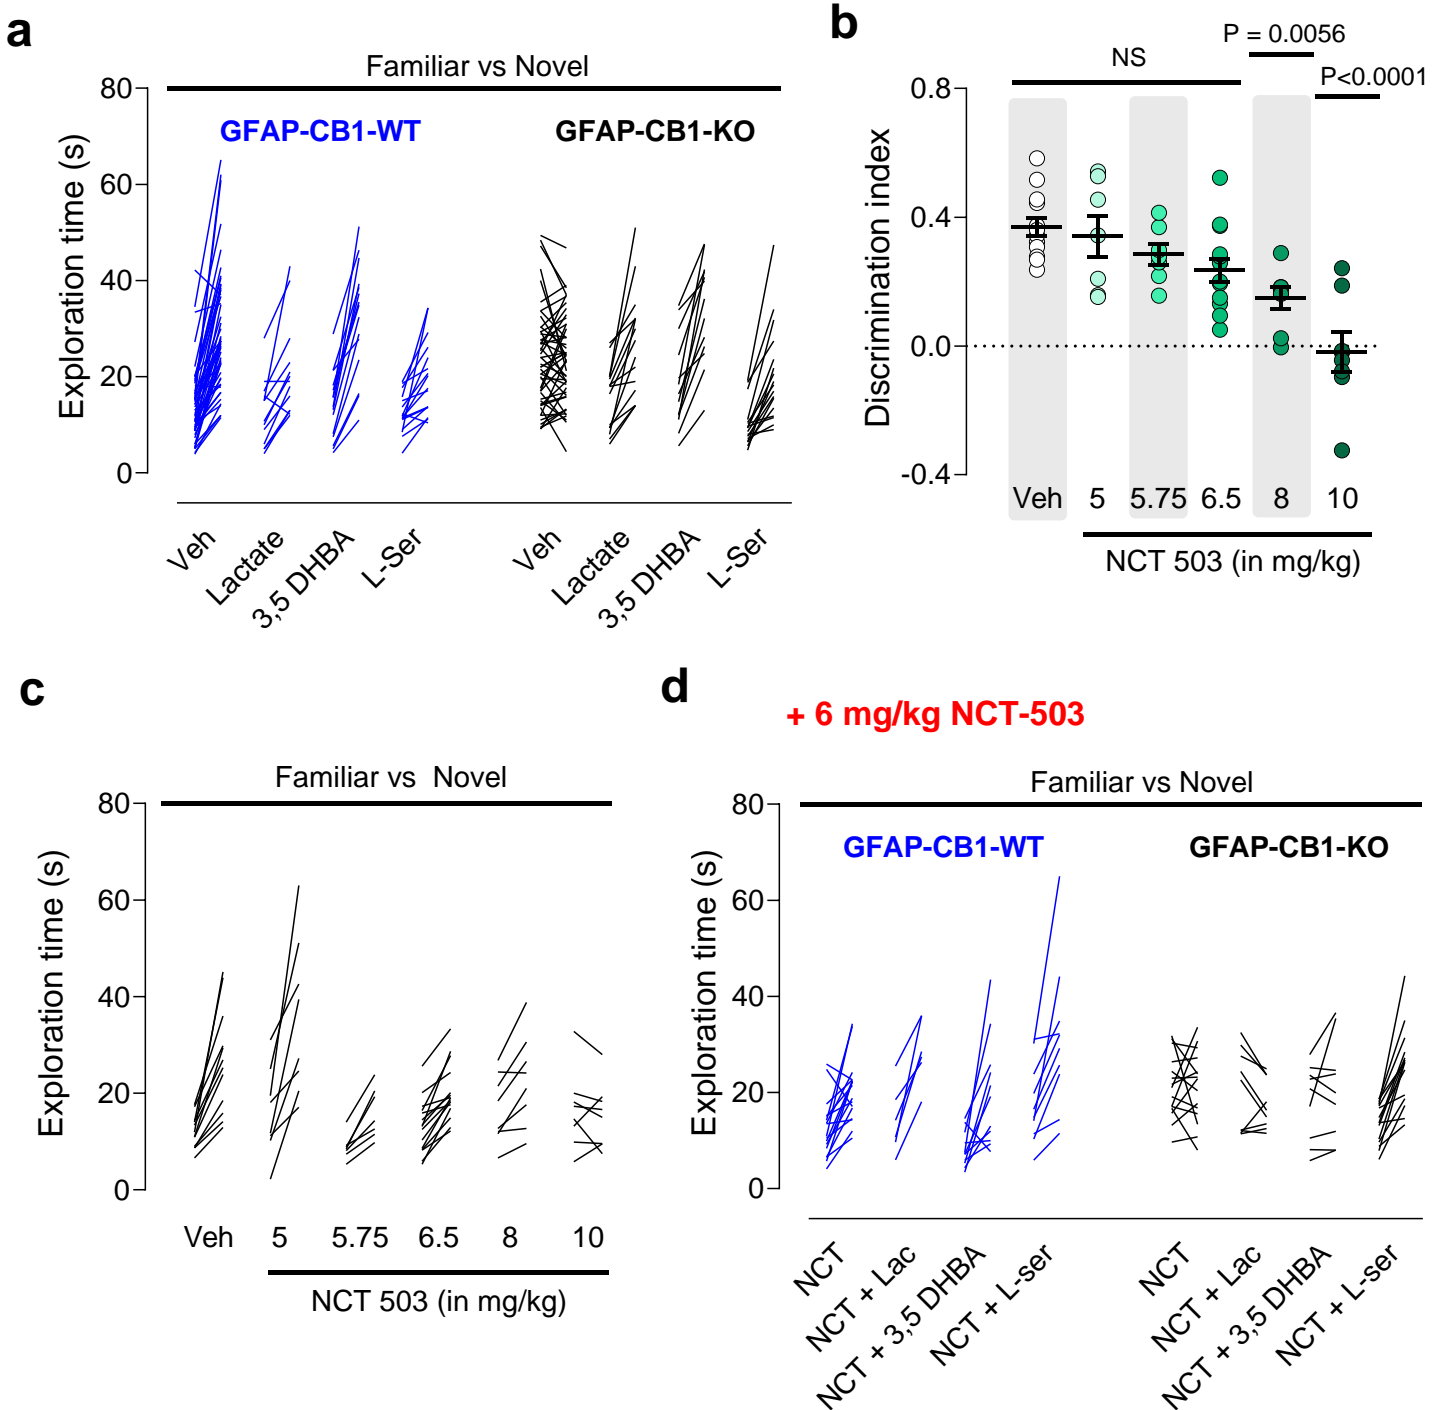

**Supplementary Figure 6 – Inhibition of the phosphorylated pathway impairs long-term NOR memory in WT mice and in lactate-treated GFAP-CB1-KO mice.** **a**, Exploration time of familiar versus novel objects in the NOR task of GFAP-CB1-WT (blue lines) and GFAP-CB1-KO mice (black lines) mice, treated either with vehicle (veh), 1 g/kg lactate (Lac) or 0.5 g/kg L-serine (L-Ser), immediately after the acquisition phase. GFAP-CB1-WT, n=13-18 animals. GFAP-CB1-KO, n= 15-23 animals. **b**, NOR performance in wild-type mice treated either with vehicle or incremental doses of NCT-503. N=7-15 mice per condition. **c**, Exploration time of familiar versus novel object in the NOR task of wild-type mice treated either with vehicle or incremental doses of NCT-503. N= 7-15 mice per condition. **d**, Exploration time of familiar versus novel object in the NOR task, of mice treated either

with vehicle + 6 mg/kg NCT-503 (NCT), 1 g/kg lactate + 6 mg/kg NCT-503 (NCT + Lac) or 0.5 g/kg L-serine + 6 mg/kg NCT-503 (NCT + L-Ser), immediately after the acquisition phase. GFAP-CB1-WT mice (blue lines), n=6-12 animals. GFAP-CB1-KO mice (black lines), n= 9-16 animals. A single line corresponds to an individual animal (**a**, **c**, **d**). Data is presented as scatter plot with the line and whisker corresponding to the mean $\pm$ SEM and circles to individual animals (**b**). Statistical analysis was performed with a One-way ANOVA followed by Tukey's multiple comparison test (**b**). See Supplementary Table 3 for more details. Source data are provided as a Source Data file.

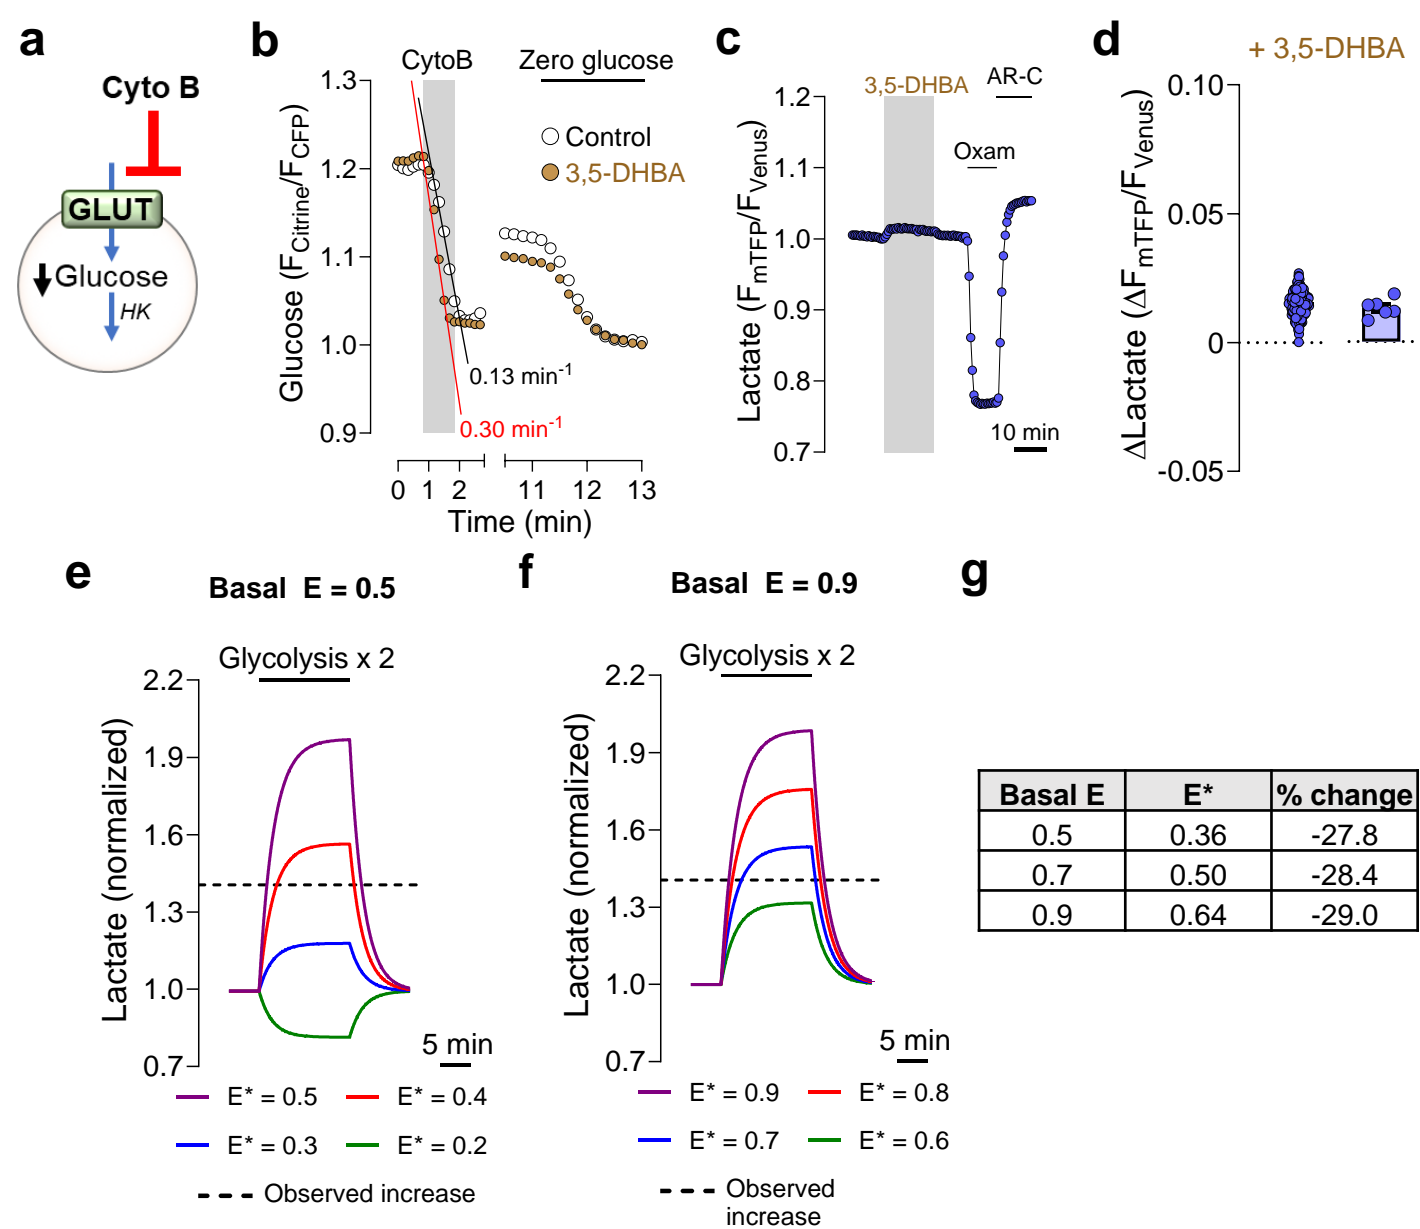

**Supplementary Figure 7 – Activation of HCA1R promotes a biased glucose metabolism.**

**a**, Transport stop protocol for measurement of glucose consumption. Cytochalasin B is an inhibitor of glucose transporter (GLUT) activity. The blockade of GLUT causes an intracellular glucose decrease that is proportional to its rate of consumption by hexokinase (HK), the first enzyme of glycolysis. **b**, Intracellular glucose measurement during exposure to cytochalasin B (CytoB, 20  $\mu$ M). Astrocytes were treated with 3,5-DHBA (1 mM) for 15 min before exposure to CytoB. **c**, Complete trace of the Fig. 3G intracellular lactate measurement during exposure to 3,5-DHBA, showing the two-point calibration used for transforming the fluorescent ratio to concentration. **d**, Quantification of lactate changes induced by 3,5 DHBA obtained from similar experiments as shown in Fig 3G. N = 6, 222 cells. **e**, Numerical simulation of intracellular lactate concentration (normalized to baseline) with basal E = 0.5, during a two-fold increase in glycolysis. During this stimulation, a decrease in glucose-to-pyruvate/lactate conversion ( $E^*$ ) was simulated. The recorded increase in intracellular lactate

concentration induced by 3,5-DHBA (see methods) is marked by a discontinuous line. **f**, Numerical simulation of intracellular lactate concentration (normalized to baseline) with basal  $E = 0.9$ , during a two-fold increase in glycolysis. During this stimulation, a decrease in glucose-to-pyruvate/lactate conversion ( $E^*$ ) was simulated. The recorded increase in intracellular lactate concentration induced by 3,5-DHBA (see methods) is marked by a discontinuous line. **g**, Summary of the  $E^*$  values required to obtain the observed intracellular lactate concentration induced by 3,5-DHBA for each basal  $E$  simulated. Data corresponds to representative cells (**b**). Data corresponds to the average (mean+SEM) of representative of experiment (**c**). Circles in scatter plot correspond to individual cells (**d**). Bars correspond to experiments average (mean+SEM) and circles represent experiment average (**d**). Solid line corresponds to a single numerical simulation (**e,f**). Source data are provided as a Source Data file.

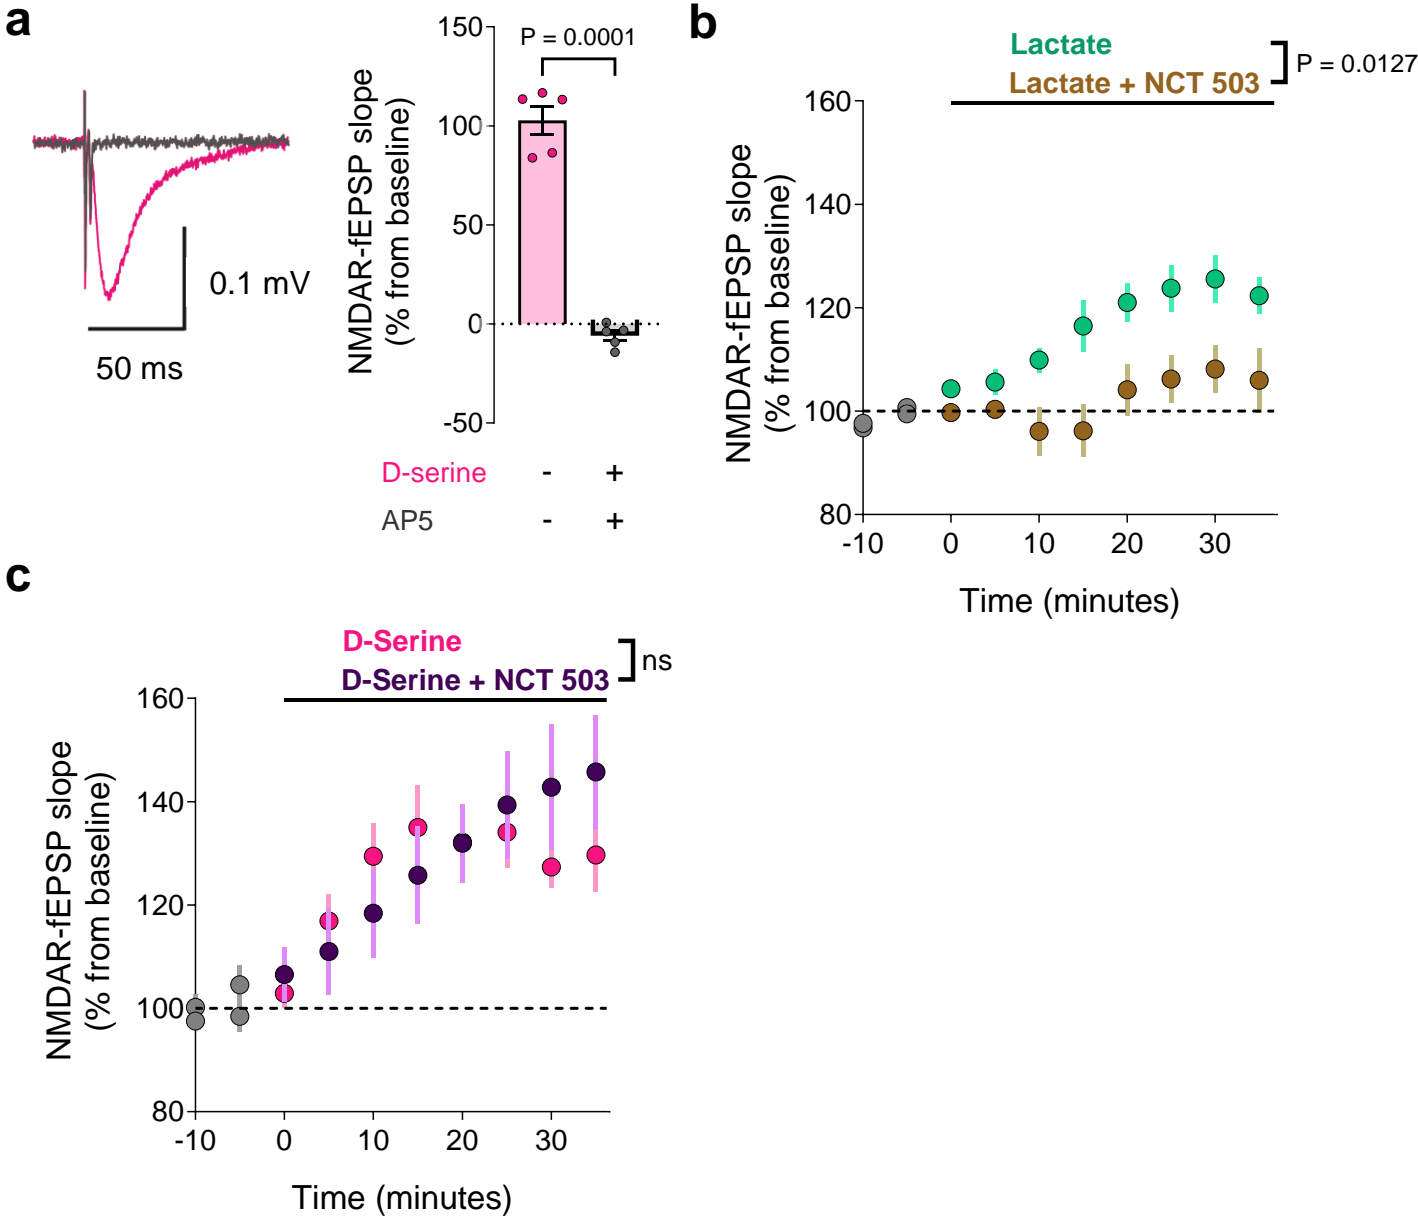

**Supplementary Figure 8 – Lactate requires the phosphorylated pathway to potentiate NMDAR**

**function.** **a**, Representative averaged traces from 20 consecutive sweeps evoked in the presence of, before (in magenta) and after bath application of D -AP5 (50  $\mu$ M) + D -serine (50  $\mu$ M). Quantification of the NMDAR-fEPSP slopes in presence of D-serine (50  $\mu$ M), before and after application D-AP5 (50  $\mu$ M) are shown in the bar plot, n=5. **b**, NMDAR-mediated fEPSP slopes in the presence of lactate (data from Fig. 4A, n=9) and lactate + NCT-503 (data from Fig. 4D, n=6). **c**, NMDAR- fEPSP slopes induced by D-serine (same as Fig. 4A, n=6) and D-serine after NCT-503 preincubation (data from Fig. 4D, n=6). Bars correspond to experiments average (mean $\pm$ SEM) and circles represent individual experiment average (**a**). Data corresponds to the experiments average and represented as mean $\pm$ SEM. Data points were averaged every 5 mins (**b,c**). Statistical analysis was performed using a two-tailed paired t-test (**a**) and two-way ANOVA (**b,c**). See Supplementary Table 3 for more details. Source data are provided as a Source Data file.

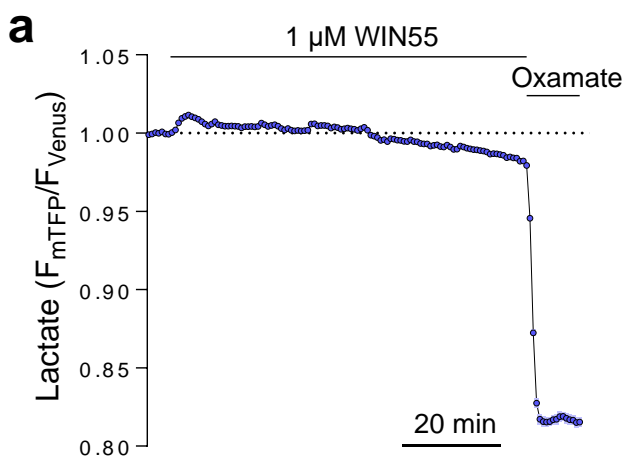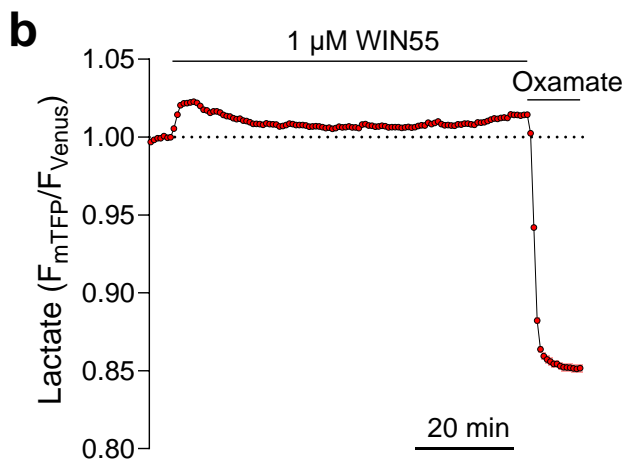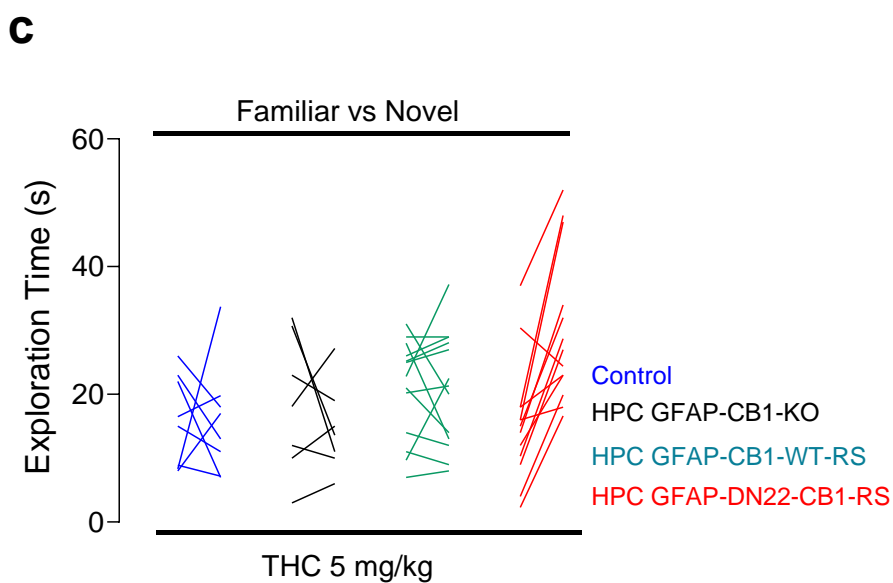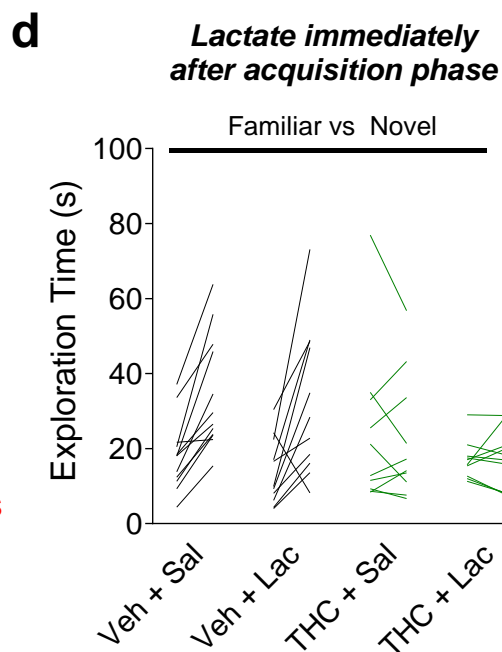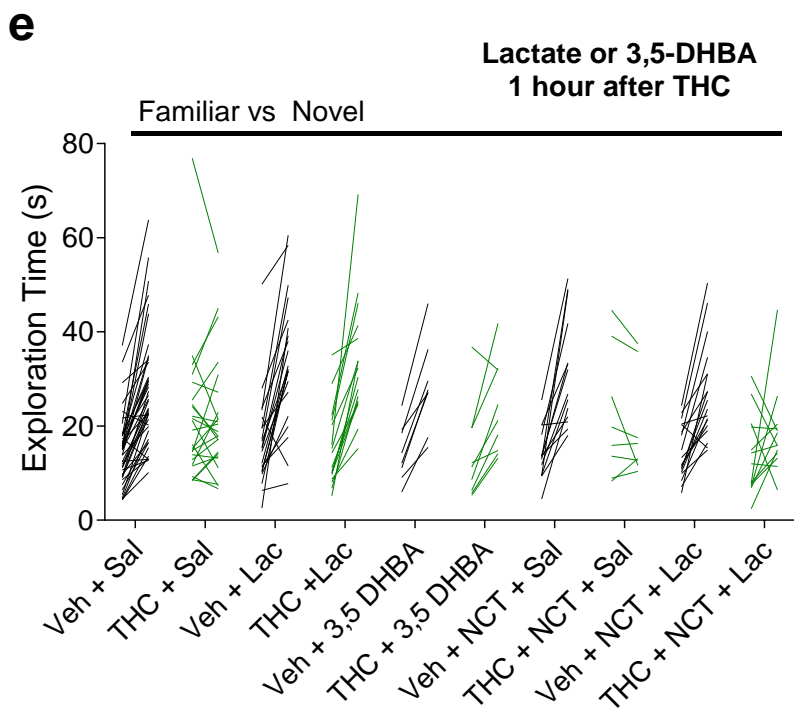

**Supplementary Figure 9 – Lactate rescues the THC-mediated impairment in novel object exploration via HCAR1 signaling and L-serine production.** **a**, Intracellular lactate imaging in CB1-WT astrocytes exposed to WIN55 (1  $\mu$ M) during 70 min. After this, cells were exposed to oxamate to deplete lactate levels for biosensor calibration. **b**, Intracellular lactate imaging in DN22-CB1-KI astrocytes exposed to WIN55 (1  $\mu$ M) during 70 min. After this, cells were exposed to oxamate to deplete lactate levels for biosensor calibration. **c**, Exploration times of familiar versus novel objects in the NOR task, from Control (blue lines), GFAP-CB1-KO (black lines), GFAP-CB1-WT-RS (teal lines) and GFAP- DN22-CB1-RS (red lines) animals treated with THC (5 mg/kg immediately after the acquisition phase. N = 7 – 13 mice per condition. **d**, Exploration time of familiar versus novel objects in the NOR task of mice treated with an IP injection of either vehicle (veh) + saline (sal), vehicle + lactate (lac, 1 g/kg), THC (5 mg/kg) + saline or THC (5 mg/kg) + lactate (1 g/kg), immediately after the acquisition phase. N= 10 – 12 mice per condition. **e**, Exploration time of familiar versus novel objects in the NOR task of mice treated with an IP injection of either vehicle (veh) or THC (5 mg/kg), immediately after the acquisition phase. After 1-hour post-THC treatment, mice were treated with an IP injection of either saline (sal), lactate (lac, 1g/kg), 3,5-DHBA (240 mg/kg), NCT-503 (NCT, 6 mg/kg) + saline or NCT-503 + lactate. N = 8 – 49 mice per condition. Experiments correspond to a representative cell (**a**, **b**). A single line corresponds to an individual animal (**c**, **d**, **e**). See Supplementary Table 3 for more details. Source data are provided as a Source Data file.



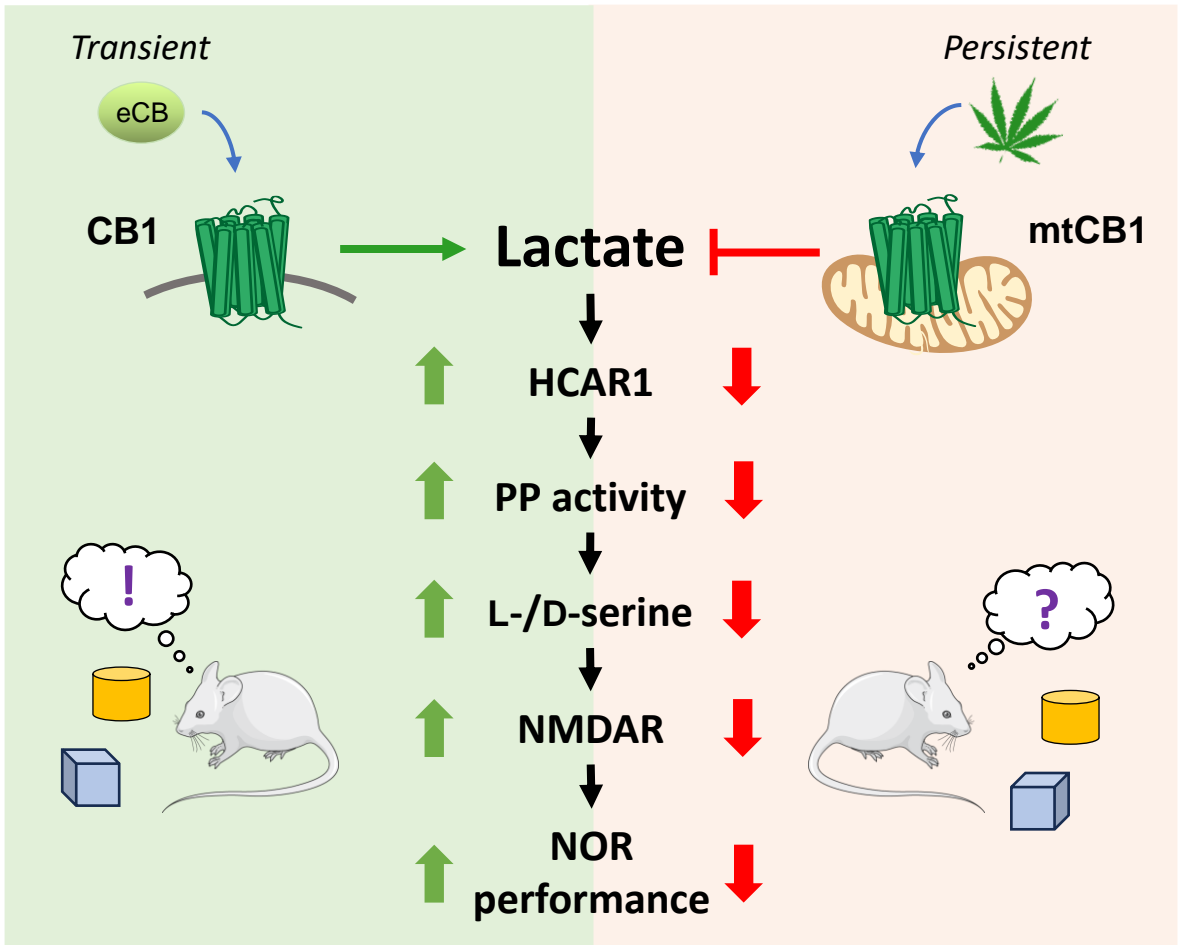

**Supplementary Figure 10 – A lactate-dependent shift of glycolysis mediates synaptic and cognitive processes.** Lactate promotes cognitive performance via a cascade involving HCAR1 and phosphorylated pathway (PP) activity, thereby increasing L-/D-serine levels and NMDAR activity to allow an adequate NOR memory consolidation. Importantly, whereas transient activation of non-mitochondrial CB1 receptors promote this novel lactate signaling to promote cognitive performance, the persistent activation of mitochondrial CB1 receptors impairs the lactate signaling and disrupt the consolidation of NOR memory via a specular mechanism. The mice cartoon was adapted from a picture provided by Servier Medical Art ([https://smart.servier.com/smart\\_image/mouse-3/](https://smart.servier.com/smart_image/mouse-3/)), licensed under a Creative Commons Attribution 4.0 Unported License.

## Supplementary Table 1.

### Details of the double-viral rescue approach to study mtCB1 receptor involvement in NOR performance

| Mice     | AAV-1*   | AAV-2*               | Outcome                                                                           | Mitochondrial Localization of CB1? | Name of used mutant mice    |
|----------|----------|----------------------|-----------------------------------------------------------------------------------|------------------------------------|-----------------------------|
| CB1-flox | GFAP-GFP | CAG-DIO-Empty        | CB1-WT                                                                            | yes                                | <b>Control</b>              |
| CB1-flox | GFAP-Cre | CAG-DIO-Empty        | CB1-KO in GFAP positive cells                                                     | no                                 | <b>HPC-GFAP-CB1-KO</b>      |
| CB1-flox | GFAP-Cre | CAG-DIO-CB1-GFP      | Re-expression of CB1-WT in GFAP positive cells (CB1 in all subcellular locations) | yes                                | <b>HPC-GFAP-CB1-RS</b>      |
| CB1-flox | GFAP-Cre | CAG-DIO-DN22-CB1-GFP | Re-expression of DN22-CB1 in GFAP positive cells (CB1 excluded from mitochondria) | no                                 | <b>HPC-GFAP-DN22-CB1-RS</b> |

\*Injected into the hippocampus (HPC)

## Supplementary Table 2 - Main figures statistics details

### Group sizes, statistical tests and P-values (page 1/2)

| Figure     | Group                            | N        | Mean     | SEM      | Statistical test           | P value                                                   | Multiple comparisons (reported in figure)          | P value |
|------------|----------------------------------|----------|----------|----------|----------------------------|-----------------------------------------------------------|----------------------------------------------------|---------|
| Fig. 1C    | CB1-WT                           | 7        | 0.0162   | 0.0029   | Kruskal Wallis test        | <0.0001                                                   | CB1-WT vs. CB1-KO                                  | 0.0133  |
|            | CB1-KO                           | 7        | -0.0005  | 0.0025   |                            |                                                           | CB1-WT vs. DN22-CB1                                | >0.9999 |
|            | DN22-CB1                         | 6        | 0.0211   | 0.0038   |                            |                                                           | CB1-KO vs. DN22-CB1                                | 0.0021  |
| Fig 1F     | Sniffers                         | 3        | -0.0105  | 0.0069   | One way ANOVA              | 0.0001                                                    | Sniffers vs Sniffers + Astro CB1-WT                | 0.0004  |
|            | Sniffers + Astro CB1-WT          | 7        | 0.0959   | 0.0134   |                            |                                                           | Sniffers vs Sniffers + Astro CB1-KO                | 0.8163  |
|            | Sniffers + Astro CB1-KO          | 4        | 0.0022   | 0.0049   |                            |                                                           | Sniffers + Astro CB1-WT vs Sniffers + Astro CB1-KO | 0.0005  |
| Fig. 1I    | Basal                            | 4        | 0.0341   | 0.005184 | Two tailed paired T-test   | <0.0001                                                   |                                                    |         |
|            | Go 6983                          | 4        | -0.01105 | 0.004554 |                            |                                                           |                                                    |         |
| Fig. 2B    | Control                          | 7        | 0.306    | 0.043    | One way ANOVA              | 0.002                                                     | Control vs. HPC-GFAP-CB1-KO                        | 0.0066  |
|            | HPC-GFAP-CB1-KO                  | 7        | -0.024   | 0.038    |                            |                                                           | Control vs. HPC-GFAP-CB1-RS                        | >0.9999 |
|            | HPC-GFAP-CB1-RS                  | 8        | 0.306    | 0.102    |                            |                                                           | Control vs. HPC-GFAP-DN22-CB1-RS                   | 0.9962  |
|            | HPC-GFAP-DN22-CB1-RS             | 9        | 0.287    | 0.033    |                            |                                                           | HPC-GFAP-CB1-KO vs. HPC-GFAP-CB1-RS                | 0.0049  |
|            |                                  |          |          |          |                            |                                                           | HPC-GFAP-CB1-KO vs. HPC-GFAP-DN22-CB1-RS           | 0.0067  |
|            |                                  |          |          |          |                            | HPC-GFAP-CB1-KO vs. HPC-GFAP-DN22-CB1-RS                  | 0.9957                                             |         |
| Fig. 3 B,D | Vehicle : GFAP-CB1-WT            | 50       | 0.3637   | 0.0246   | Two way ANOVA              |                                                           | Vehicle:GFAP-CB1-WT vs. Vehicle:GFAP-CB1-KO        | <0.0001 |
|            | Vehicle : GFAP-CB1-KO            | 49       | 0.0005   | 0.0239   | Interaction                | <0.0001                                                   | Vehicle:GFAP-CB1-WT vs. Lactate:GFAP-CB1-WT        | 0.9958  |
|            | Lactate : GFAP-CB1-WT            | 13       | 0.2927   | 0.0547   | Treatment                  | <0.0001                                                   | Vehicle:GFAP-CB1-WT vs. L-Serine:GFAP-CB1-WT       | 0.2718  |
|            | Lactate : GFAP-CB1-KO            | 15       | 0.2760   | 0.0407   | Genotype                   | <0.0001                                                   | Vehicle:GFAP-CB1-WT vs. 3,5 DHBA:GFAP-CB1-WT       | 0.9995  |
|            | 3,5-DHBA : GFAP-CB1-WT           | 15       | 0.4190   | 0.0331   |                            |                                                           | Vehicle:GFAP-CB1-WT vs. NCT:GFAP-CB1-WT            | 0.8037  |
|            | 3,5-DHBA : GFAP-CB1-KO           | 10       | 0.3046   | 0.0440   |                            |                                                           | Vehicle:GFAP-CB1-WT vs. NCT + Lac:GFAP-CB1-WT      | >0.9999 |
|            | L-serine : GFAP-CB1-WT           | 16       | 0.2216   | 0.0419   |                            |                                                           | Vehicle:GFAP-CB1-WT vs. NCT + L-Serine:GFAP-CB1-WT | 0.9501  |
|            | L-serine : GFAP-CB1-KO           | 17       | 0.3246   | 0.0403   |                            |                                                           | Vehicle:GFAP-CB1-WT vs. NCT + 3,5-DHBA:GFAP-CB1-WT | >0.9999 |
|            | Vehicle : GFAP-CB1-WT : NCT-503  | 17       | 0.2631   | 0.0532   |                            |                                                           | Vehicle:GFAP-CB1-KO vs. Lactate:GFAP-CB1-KO        | <0.0001 |
|            | Vehicle : GFAP-CB1-KO : NCT-503  | 14       | -0.0097  | 0.0533   |                            |                                                           | Vehicle:GFAP-CB1-KO vs. L-Serine:GFAP-CB1-KO       | <0.0001 |
|            | Lactate : GFAP-CB1-WT : NCT-503  | 6        | 0.3656   | 0.0701   |                            |                                                           | Vehicle:GFAP-CB1-KO vs. 3,5 DHBA:GFAP-CB1-KO       | 0.0001  |
|            | Lactate : GFAP-CB1-KO : NCT-503  | 9        | -0.0484  | 0.0467   |                            |                                                           | Vehicle:GFAP-CB1-KO vs. NCT:GFAP-CB1-KO            | >0.9999 |
|            | 3,5-DHBA : GFAP-CB1-WT : NCT-503 | 9        | 0.2565   | 0.0480   |                            |                                                           | Lactate:GFAP-CB1-WT vs. Lactate:GFAP-CB1-KO        | >0.9999 |
|            | 3,5-DHBA : GFAP-CB1-KO : NCT-503 | 9        | 0.0599   | 0.0460   |                            |                                                           | Lactate:GFAP-CB1-WT vs. L-Serine:GFAP-CB1-WT       | 0.9995  |
|            | L-serine : GFAP-CB1-WT : NCT-503 | 11       | 0.3655   | 0.0926   |                            |                                                           | Lactate:GFAP-CB1-WT vs. 3,5 DHBA:GFAP-CB1-WT       | 0.8778  |
|            | L-serine : GFAP-CB1-KO : NCT-503 | 16       | 0.3019   | 0.0354   |                            |                                                           | Lactate:GFAP-CB1-WT vs. NCT + Lac:GFAP-CB1-WT      | >0.9999 |
|            |                                  |          |          |          |                            |                                                           | L-Serine:GFAP-CB1-WT vs. L-Serine:GFAP-CB1-KO      | 0.951   |
|            |                                  |          |          |          |                            |                                                           | L-Serine:GFAP-CB1-KO vs. 3,5 DHBA:GFAP-CB1-KO      | >0.9999 |
|            |                                  |          |          |          |                            |                                                           | 3,5 DHBA:GFAP-CB1-WT vs. 3,5 DHBA:GFAP-CB1-KO      | 0.9689  |
|            |                                  |          |          |          |                            |                                                           | 3,5 DHBA:GFAP-CB1-WT vs. NCT:GFAP-CB1-WT           | 0.4767  |
|            |                                  |          |          |          |                            | 3,5 DHBA:GFAP-CB1-WT vs. NCT + 3,5-DHBA:GFAP-CB1-WT       | >0.9999                                            |         |
|            |                                  |          |          |          |                            | NCT:GFAP-CB1-WT vs. NCT:GFAP-CB1-KO                       | 0.0026                                             |         |
|            |                                  |          |          |          |                            | NCT + Lac:GFAP-CB1-WT vs. NCT + Lac:GFAP-CB1-KO           | 0.0013                                             |         |
|            |                                  |          |          |          |                            | NCT + L-Serine:GFAP-CB1-WT vs. NCT + L-Serine:GFAP-CB1-KO | >0.9999                                            |         |
|            |                                  |          |          |          |                            | NCT + 3,5-DHBA:GFAP-CB1-WT vs. NCT + 3,5-DHBA:GFAP-CB1-KO | 0.0134                                             |         |
| Fig 3E     | Control                          | 63 cells | 0.1014   | 0.0086   | Mann-Whitney               | <0.0001                                                   |                                                    |         |
|            | 3,5-DHBA                         | 48 cells | 0.2011   | 0.0148   |                            |                                                           |                                                    |         |
| Fig. 4A    | Lactate                          | 8        | 124      | 11.86    | Two-tailed unpaired T-test | 0.5927                                                    |                                                    |         |
|            | D-serine                         | 5        | 127.7    | 12.25    |                            |                                                           |                                                    |         |
| Fig. 4B    | Lactate                          | 8        | 0.09335  | 0.01583  | Two-tailed unpaired T-test | 0.0032                                                    |                                                    |         |
|            | D-Serine                         | 5        | 0.294    | 0.06443  |                            |                                                           |                                                    |         |
| Fig. 4C    | baseline                         | 6        | 100.1    | 0.1091   | Two-tailed paired T-test   | 0.6782                                                    |                                                    |         |
|            | Lactate                          | 6        | 102.1    | 4.389    |                            |                                                           |                                                    |         |
| Fig. 4D    | Lactate + NCT-503                | 6        | 111.4    | 6.615    | Two-tailed unpaired T-test | 0.0212                                                    |                                                    |         |
|            | D-Serine + NCT-503               | 6        | 138.8    | 7.576    |                            |                                                           |                                                    |         |
|            | baseline (NCT-503)               | 6        | 99.92    | 0.1241   | Two-tailed paired T-test   | 0.143                                                     |                                                    |         |
|            | Lactate + NCT-503                | 6        | 111.4    | 6.615    |                            |                                                           |                                                    |         |
| Fig. 4F    | Baseline                         | 6        | 101      | 0.747    | Two-tailed paired T-test   | 0.0096                                                    |                                                    |         |
|            | 3,5-DHBA                         | 6        | 128.8    | 6.888    |                            |                                                           |                                                    |         |
|            | Baseline                         | 8        | 100.6    | 0.8498   | Two-tailed paired T-test   | 0.4576                                                    |                                                    |         |
|            | D-serine                         | 8        | 104.2    | 4.463    |                            |                                                           |                                                    |         |

## Supplementary Table 2 - Main figures statistics details

Group sizes, statistical tests and P-values (page 2/2)

|         |                             |    |          |                                          |                     |                                 |                                                         |         |
|---------|-----------------------------|----|----------|------------------------------------------|---------------------|---------------------------------|---------------------------------------------------------|---------|
| Fig. 5A | 5 min post WIN55            | 11 | 0.0149   | 0.0024                                   | Mixed-effects model | <0.0001                         | baseline vs. 5 min                                      | 0.0277  |
|         | 10 min post WIN55           | 4  | 0.0085   | 0.0045                                   |                     |                                 | baseline vs. 10 min                                     | 0.3801  |
|         | 20 min post WIN55           | 4  | 0.0037   | 0.0042                                   |                     |                                 | baseline vs. 20 min                                     | 0.9626  |
|         | 30 min post WIN55           | 4  | -0.0001  | 0.0049                                   |                     |                                 | baseline vs. 30 min                                     | >0.9999 |
|         | 40 min post WIN55           | 4  | -0.0042  | 0.0040                                   |                     |                                 | baseline vs. 40 min                                     | 0.9315  |
|         | 50 min post WIN55           | 4  | -0.0110  | 0.0049                                   |                     |                                 | baseline vs. 50 min                                     | 0.1578  |
|         | 60 min post WIN55           | 4  | -0.0179  | 0.0078                                   |                     |                                 | baseline vs. 60 min                                     | 0.007   |
|         | 70 min post WIN55           | 4  | -0.0264  | 0.0090                                   |                     |                                 | baseline vs. 70 min                                     | <0.0001 |
| Fig. 5B | 5 min post WIN55            | 10 | 0.0242   | 0.0030                                   | Mixed-effects model | 0.001                           | baseline vs. 5 min                                      | 0.0002  |
|         | 10 min post WIN55           | 4  | 0.0245   | 0.0069                                   |                     |                                 | baseline vs. 10 min                                     | 0.0013  |
|         | 20 min post WIN55           | 4  | 0.0202   | 0.0082                                   |                     |                                 | baseline vs. 20 min                                     | 0.0087  |
|         | 30 min post WIN55           | 4  | 0.0165   | 0.0072                                   |                     |                                 | baseline vs. 30 min                                     | 0.0399  |
|         | 40 min post WIN55           | 4  | 0.0155   | 0.0060                                   |                     |                                 | baseline vs. 40 min                                     | 0.0573  |
|         | 50 min post WIN55           | 4  | 0.0125   | 0.0029                                   |                     |                                 | baseline vs. 50 min                                     | 0.1711  |
|         | 60 min post WIN55           | 4  | 0.0095   | 0.0011                                   |                     |                                 | baseline vs. 60 min                                     | 0.4141  |
|         | 70 min post WIN55           | 4  | 0.0081   | 0.0034                                   |                     |                                 | baseline vs. 70 min                                     | 0.5788  |
| Fig. 5C | Control                     | 8  | -0.0226  | 0.1276                                   | One way ANOVA       | 0.002                           | Control vs. HPC-GFAP-CB1-KO                             | 0.9981  |
|         | HPC-GFAP-CB1-KO             | 7  | -0.0466  | 0.1176                                   |                     |                                 | Control vs. HPC-GFAP-CB1-RS                             | 0.9991  |
|         | HPC-GFAP-CB1-RS             | 13 | -0.0062  | 0.0545                                   |                     |                                 | Control vs. HPC-GFAP-DN22-CB1-RS                        | 0.0158  |
|         | HPC-GFAP-DN22-CB1-RS        | 13 | 0.3594   | 0.0679                                   |                     |                                 | HPC-GFAP-CB1-KO vs. HPC-GFAP-CB1-RS                     | 0.9884  |
|         |                             |    |          |                                          |                     |                                 | HPC-GFAP-CB1-KO vs. HPC-GFAP-DN22-CB1-RS                | 0.0136  |
|         |                             |    |          | HPC-GFAP-CB1-KO vs. HPC-GFAP-DN22-CB1-RS | 0.0071              |                                 |                                                         |         |
| Fig. 5D | Vehicle : Saline            | 12 | 0.3246   | 0.0444                                   | Two way ANOVA       | 0.505                           | Saline:Vehicle vs. Saline:THC                           | 0.0003  |
|         | THC : Saline                | 11 | -0.0178  | 0.0610                                   |                     |                                 | Interaction                                             | 0.7752  |
|         | Vehicle : Lactate           | 10 | 0.3953   | 0.0620                                   | Lactate             | 0.5317                          | Saline:Vehicle vs. Lactate:THC                          | 0.0003  |
|         | THC : Lactate               | 10 | -0.0200  | 0.0484                                   | THC                 | <0.0001                         | Saline:THC vs. Lactate:Vehicle                          | <0.0001 |
|         |                             |    |          |                                          |                     |                                 | Saline:THC vs. Lactate:THC                              | >0.9999 |
|         |                             |    |          |                                          |                     | Lactate:Vehicle vs. Lactate:THC | <0.0001                                                 |         |
| Fig. 5E | Vehicle : Saline            | 42 | 0.305362 | 0.027283                                 | Two way ANOVA       | 0.0001                          | Saline + Vehicle vs. Saline + THC                       | <0.0001 |
|         | THC : Saline                | 24 | 0.015965 | 0.04061                                  |                     |                                 | Interaction                                             | 0.9999  |
|         | Vehicle : Lactate           | 21 | 0.339832 | 0.051617                                 | Treatment 2         | <0.0001                         | Saline + Vehicle vs. Lactate 1h after + THC             | 0.9011  |
|         | THC : Lactate               | 23 | 0.387984 | 0.051963                                 | THC                 | <0.0001                         | Saline + Vehicle vs. 3,5 DHBA 1h after + Vehicle        | >0.9999 |
|         | Vehicle : 3,5-DHBA          | 8  | 0.339324 | 0.03525                                  |                     |                                 | Saline + Vehicle vs. 3,5 DHBA 1h after + THC            | >0.9999 |
|         | THC : 3,5-DHBA              | 9  | 0.306085 | 0.062923                                 |                     |                                 | Saline + Vehicle vs. NCT + Vehicle                      | 0.982   |
|         | Vehicle : Saline : NCT-503  | 14 | 0.380169 | 0.049633                                 |                     |                                 | Saline + Vehicle vs. NCT + THC                          | 0.0016  |
|         | THC : Saline : NCT-503      | 12 | 0.006681 | 0.055404                                 |                     |                                 | Saline + THC vs. Lactate 1h after + THC                 | <0.0001 |
|         | Vehicle : Lactate : NCT-503 | 18 | 0.300849 | 0.042664                                 |                     |                                 | Saline + THC vs. 3,5 DHBA 1h after + Vehicle            | 0.0119  |
|         | THC : Lactate : NCT-503     | 17 | 0.054124 | 0.083171                                 |                     |                                 | Saline + THC vs. 3,5 DHBA 1h after + THC                | 0.0252  |
|         |                             |    |          |                                          |                     |                                 | Saline + THC vs. NCT + Vehicle                          | <0.0001 |
|         |                             |    |          |                                          |                     |                                 | Saline + THC vs. NCT + THC                              | >0.9999 |
|         |                             |    |          |                                          |                     |                                 | Saline + THC vs. Lactate + NCT + THC                    | >0.9999 |
|         |                             |    |          |                                          |                     |                                 | Lactate 1h after + Vehicle vs. Lactate 1h after + THC   | 0.9992  |
|         |                             |    |          |                                          |                     |                                 | Lactate 1h after + Vehicle vs. Lactate + NCT + THC      | 0.003   |
|         |                             |    |          |                                          |                     |                                 | 3,5 DHBA 1h after + Vehicle vs. 3,5 DHBA 1h after + THC | >0.9999 |
|         |                             |    |          |                                          |                     |                                 | Lactate + NCT + Vehicle vs. Lactate + NCT + THC         | 0.0302  |

## Supplementary Table 3 - Supplementary figures statistics details

### Group sizes, statistical tests and P-values

| Figure           | Group              | N  | Mean     | SEM                    | Statistical test           | P value | Multiple comparisons (reported in figure) | P value |
|------------------|--------------------|----|----------|------------------------|----------------------------|---------|-------------------------------------------|---------|
| Ext. data Fig 1B | Vehicle            | 3  | 0.7325   | 0.01123                | Two-tailed unpaired T-test | <0.0001 |                                           |         |
|                  | WIN55              | 3  | 0.5498   | 0.02122                |                            |         |                                           |         |
| Ext. data Fig 1D | Baseline (BL)      | 3  | 0.9929   | 0.002431               | Two-tailed paired T-test   | <0.0001 |                                           |         |
|                  | WIN55              | 3  | 1.032    | 0.001816               |                            |         |                                           |         |
| Ext. data Fig 2B | CB1-WT             | 4  | 0.4798   | 0.05392                | Kruskal-Wallis test        | 0.6298  | CB1-WT vs. CB1-KO                         | 0.9804  |
|                  | CB1-KO             | 4  | 0.5483   | 0.03634                |                            |         | CB1-WT vs. DN22-CB1                       | >0.9999 |
|                  | DN22-WT            | 4  | 0.5541   | 0.0473                 |                            |         | CB1-KO vs. DN22-CB1                       | >0.9999 |
| Ext. data Fig 2C | CB1-WT             | 4  | 0.06298  | 0.01233                | One way ANOVA              | 0.4612  | CB1-WT vs. CB1-KO                         | 0.449   |
|                  | CB1-KO             | 4  | 0.04552  | 0.009156               |                            |         | CB1-WT vs. DN22-CB1                       | 0.6554  |
|                  | DN22-WT            | 4  | 0.05058  | 0.007127               |                            |         | CB1-KO vs. DN22-CB1                       | 0.9295  |
| Ext. data Fig 2D | CB1-WT             | 7  | 0.0385   | 0.004412               | One way ANOVA              | 0.3815  | CB1-WT vs. CB1-KO                         | 0.3496  |
|                  | CB1-KO             | 7  | 0.02675  | 0.006981               |                            |         | CB1-WT vs. DN22-CB1                       | 0.7466  |
|                  | DN22-WT            | 6  | 0.0322   | 0.00623                |                            |         | CB1-KO vs. DN22-CB1                       | 0.8022  |
| Ext. data Fig 3B | First measurement  | 4  | 0.02854  | 0.001203               | Two-tailed paired T-test   | 0.2564  |                                           |         |
|                  | Second measurement | 4  | 0.03095  | 0.002664               |                            |         |                                           |         |
| Ext. data Fig 3D | Basal              | 4  | 0.02441  | 0.0013                 | Two-tailed paired T-test   | 0.0317  |                                           |         |
|                  | WIN55              | 4  | 0.03174  | 0.001944               |                            |         |                                           |         |
| Ext. data Fig 4B | First measurement  | 4  | 0.02143  | 0.007549               | Two-tailed paired T-test   | 0.391   |                                           |         |
|                  | Second measurement | 4  | 0.02148  | 0.007517               |                            |         |                                           |         |
| Ext. data Fig 5B | GFP (+) - GFAP (+) | 4  | 93.81    | 0.762                  |                            |         |                                           |         |
|                  | GFP (+) - GFAP (-) | 4  | 6.195    | 0.762                  |                            |         |                                           |         |
| Ext. data Fig 6B | Vehicle            | 13 | 0.3688   | 0.02855                | One way ANOVA              | <0.0001 | Vehicle vs. 5 mg/kg                       | 0.9973  |
|                  | 5 mg/kg NCT-503    | 7  | 0.3407   | 0.06452                |                            |         | Vehicle vs. 5.75 mg/kg                    | 0.7351  |
|                  | 5.75 mg/kg NCT-503 | 7  | 0.2842   | 0.03302                |                            |         | Vehicle vs. 6.5 mg/kg                     | 0.0911  |
|                  | 6.5mg/kg NCT-503   | 15 | 0.2353   | 0.03493                |                            |         | Vehicle vs. 8 mg/kg                       | 0.0056  |
|                  | 8 mg/kg NCT-503    | 8  | 0.1494   | 0.03349                |                            |         | Vehicle vs. 10 mg/kg                      | <0.0001 |
|                  | 10 mg/kg NCT-503   | 8  | -0.01882 | 0.06185                |                            |         | 5 mg/kg vs. 5.75 mg/kg                    | 0.964   |
|                  |                    |    |          |                        |                            |         | 5 mg/kg vs. 6.5 mg/kg                     | 0.4935  |
|                  |                    |    |          |                        |                            |         | 5 mg/kg vs. 8 mg/kg                       | 0.0667  |
|                  |                    |    |          |                        |                            |         | 5 mg/kg vs. 10 mg/kg                      | <0.0001 |
|                  |                    |    |          |                        |                            |         | 5.75 mg/kg vs. 6.5 mg/kg                  | 0.9622  |
|                  |                    |    |          |                        |                            |         | 5.75 mg/kg vs. 8 mg/kg                    | 0.3556  |
|                  |                    |    |          |                        |                            |         | 5.75 mg/kg vs. 10 mg/kg                   | 0.0005  |
|                  |                    |    |          |                        |                            |         | 6.5 mg/kg vs. 8 mg/kg                     | 0.6613  |
|                  |                    |    |          | 6.5 mg/kg vs. 10 mg/kg | 0.0006                     |         |                                           |         |
|                  |                    |    |          | 8 mg/kg vs. 10 mg/kg   | 0.1195                     |         |                                           |         |
| Ext. data Fig 7D | 3,5-DHBA           | 4  | 0.01303  | 0.001426               |                            |         |                                           |         |
| Ext. data Fig 8A | D-serine           | 5  | 102.7    | 7.238                  | Two-tailed paired T-test   | 0.0001  |                                           |         |
|                  | D-serine + D-AP5   | 5  | -5.945   | 2.604                  |                            |         |                                           |         |
| Ext. data Fig 8B |                    | N  |          |                        | Two way ANOVA              |         |                                           |         |
|                  | Lactate            | 9  |          |                        | Time x Treatment           | 0.0007  |                                           |         |
|                  | Lactate + NCT-503  | 5  |          |                        | Time                       | <0.0001 |                                           |         |
|                  |                    |    |          |                        | Treatment                  | 0.0127  |                                           |         |
| Ext. data Fig 8C |                    | N  |          |                        | Two way ANOVA              | P value |                                           |         |
|                  | D-serine           | 6  |          |                        | Time x Treatment           | 0.0604  |                                           |         |
|                  | D-serine + NCT-503 | 4  |          |                        | Time                       | <0.0001 |                                           |         |
|                  |                    |    |          |                        | Treatment                  | 0.6915  |                                           |         |
